# Supplementary material for: Validity and reliability of a repeated multi-changes of direction agility test in senior soccer players
Source: PeerJ. 2024 Jan 19;12:e16753. doi: 10.7717/peerj.16753 (PMC10802156; doi:10.7717/peerj.16753)
Supplement: Supplemental Information 1 — ICC: 1 = Pre; 2 = Post; FI = Fatigue Index; BT = Best Time; TT = Total Time; La = blood lactate; RPE = rating of perceived effort; [file peerj-12-16753-s001.xlsx]

## Sheet: ICC
Subject	FI1	FI2	BT1	BT2	TT1	TT2	La1	La2	RPE1	RPE2	ΔLa1	ΔLa2
1	4.70449	5.50242	9.4	9.41	88.58	89.35	14.18	13.88	8	9	4.672	5.03478
2	1.82889	0.488938	8.87	9.09	81.29	82.21	13.82	12.8	8	8	3.93571	3.12903
3	4.09159	5.16854	8.88	8.9	83.19	84.24	12.74	12.74	9	8	2.98125	3.3931
4	5.71501	6.4254	8.71	8.75	82.87	83.81	11.92	11.96	7	9	5.34043	5.64444
5	4.2217	4.05093	8.58	8.64	80.48	80.91	9.8	10	7	7	3.62264	3.80769
6	2.15091	2.0559	9.66	9.62	88.81	88.36	14.3	13.6	9	8	5.68224	5.07143
7	6.55556	7.74903	9	8.89	86.31	86.21	12.4	14.2	9	9	5.88889	6.88889
8	5.79183	5.76531	9.17	9.27	87.31	88.24	12.82	12	9	9	7.66216	7.10811
9	5.56755	6.53809	9.26	9.16	87.98	87.83	14.76	14.76	8	10	7.78571	7.78571
10	5.35977	4.04589	9.08	9.2	86.1	86.15	12.67	11.9	10	10	5.66842	5.26316
11	7.72784	7.14464	8.9	8.88	86.29	85.63	12.28	13	7	10	5.82222	6.22222
12	1.83811	2.56226	9.43	9.28	86.43	85.66	12.89	12	8	9	8.20714	7.57143
13	4.08389	5.12821	9.06	9.1	84.87	86.1	13.66	13	7	9	7.22892	7.125
14	8.38207	8.11486	9.12	8.9	88.96	86.6	13.86	14.2	9	10	5.6	3.4375
15	6.78727	4.86891	8.66	8.9	83.23	84	12.4	12.6	9	8	4.68807	4.72727
16	7.58025	6.47321	9	8.96	87.14	85.86	11.96	11.8	8	8	6.42857	6.02381
17	3.99113	1.42627	9.02	9.66	84.42	88.18	10.86	10.9	9	10	5.96154	5.98718
18	3.33855	3.73385	8.52	8.6	79.24	80.29	14.36	14.6	8	9	9.11268	9.42857
19	3.6214	3.71945	9.45	9.41	88.13	87.84	9.76	9.88	10	9	6.07246	6.6
20	3.06866	3.90181	8.69	8.6	80.61	80.42	10.66	10.8	10	8	7.32813	5.92308
21	5.13008	6.47131	9.14	9.1	86.48	87.2	13.24	13.8	9	9	5.30476	5.57143
22	11.8256	10.046	9.02	9.18	90.78	90.92	14.92	14.8	9	9	7.1087	6.70833
23	5.98477	5.56161	9.19	9.17	87.66	87.12	13.64	13.8	8	10	7.31707	7.31325
24	9.32099	10.5802	9	9	88.55	89.57	12.92	13.4	9	10	5.15238	5.63366
25	3.01164	3.0126	9.74	9.7	90.3	89.93	12.1	12.8	7	10	8.45312	7.88889
26	4.23389	4.75023	9.71	9.52	91.09	89.75	14.36	14	7	9	6.55789	6.52688
27	1.96998	2.91405	10.66	10.6	97.83	98.18	13.2	13.6	8	8	6.3743	6.23404
28	4.66226	2.38095	9.08	9.52	85.53	87.72	14.32	14	8	8	10.7377	6
29	12.3069	13.6829	8.92	8.9	90.16	91.06	13.12	13	8	8	7.51948	7.33333
30	7.65129	6.83761	8.96	9.1	86.81	87.5	14.84	12.8	9	7	3.94667	3.44444
31	11.3258	11.2484	8.8	8.9	88.17	89.11	10.8	10.9	7	9	4.93407	5.33721
32	6.04354	5.09515	8.88	9.05	84.75	85.6	11.5	11.8	10	9	5.88623	6.10843
33	3.4112	5.92593	8.99	8.7	83.67	82.94	15.12	15.6	10	9	4.81538	5.5
34	5.06516	6.57296	8.27	8.3	78.2	79.61	12.3	12.8	7	8	8.04412	8.84615
35	4.14371	2.73769	9.68	9.7	90.73	89.69	11.5	11.2	8	8	7.27338	3

## Sheet: ANOVA
Subject	Level	Var	S-RSA	rMCOD	RSA
1	Elite	Time	60.48	88.58	37.51
1	Elite	Best	8.42	9.4	6.12
1	Elite	Fatigue	2.61283	4.70449	2.15142
1	Elite	RPE	9	8	8
2	Elite	Time	54.66	81.29	35.9
2	Elite	Best	7.68	8.87	5.91
2	Elite	Fatigue	1.67411	1.82889	1.24083
2	Elite	RPE	8	8	8
3	Elite	Time	57.7	83.19	35.73
3	Elite	Best	7.72	8.88	5.69
3	Elite	Fatigue	6.77276	4.09159	4.65729
3	Elite	RPE	9	9	8
4	Elite	Time	58.02	82.87	36.94
4	Elite	Best	8.02	8.71	5.94
4	Elite	Fatigue	3.34877	5.71501	3.64759
4	Elite	RPE	8	7	9
5	Elite	Time	59.61	80.48	36.26
5	Elite	Best	8.2	8.58	5.94
5	Elite	Fatigue	3.85017	4.2217	1.73962
5	Elite	RPE	7	7	10
6	Elite	Time	63.4	88.81	39.02
6	Elite	Best	8.52	9.66	6.22
6	Elite	Fatigue	6.30449	2.15091	4.5552
6	Elite	RPE	7	9	10
7	Elite	Time	59	86.31	37.63
7	Elite	Best	7.66	9	5.8
7	Elite	Fatigue	10.0336	6.55556	8.13218
7	Elite	RPE	8	9	9
8	Elite	Time	62.06	87.31	37.28
8	Elite	Best	8.44	9.17	6.08
8	Elite	Fatigue	5.04401	5.79183	2.19298
8	Elite	RPE	8	9	8
9	Elite	Time	59.02	87.98	37.5
9	Elite	Best	7.9	9.26	5.88
9	Elite	Fatigue	6.72694	5.56755	6.29252
9	Elite	RPE	8	8	8
10	Elite	Time	57.97	86.1	36.89
10	Elite	Best	8.01	9.08	5.92
10	Elite	Fatigue	3.38862	5.35977	3.85698
10	Elite	RPE	9	10	7
11	Elite	Time	58.34	86.29	35.92
11	Elite	Best	7.56	8.9	5.6
11	Elite	Fatigue	10.2419	7.72784	6.90476
11	Elite	RPE	9	7	6
12	Elite	Time	60.4	86.43	35.85
12	Elite	Best	8.32	9.43	5.86
12	Elite	Fatigue	3.70879	1.83811	1.96246
12	Elite	RPE	9	8	8
13	Elite	Time	58.71	84.87	36.92
13	Elite	Best	8.12	9.06	5.97
13	Elite	Fatigue	3.28994	4.08389	3.07091
13	Elite	RPE	8	7	8
14	Elite	Time	62.32	88.96	40.12
14	Elite	Best	8.44	9.12	6.1
14	Elite	Fatigue	5.48409	8.38207	9.61749
14	Elite	RPE	7	9	9
15	Elite	Time	60.3	83.23	36.87
15	Elite	Best	8.24	8.66	5.96
15	Elite	Fatigue	4.5423	6.78727	3.10403
15	Elite	RPE	8	9	7
16	Elite	Time	61.14	87.14	38.26
16	Elite	Best	8	9	5.86
16	Elite	Fatigue	9.17857	7.58025	8.81684
16	Elite	RPE	7	8	9
17	Elite	Time	58.9	84.42	37.52
17	Elite	Best	8.09	9.02	6.1
17	Elite	Fatigue	4.00848	3.99113	2.51366
17	Elite	RPE	8	9	9
18	Elite	Time	57.21	79.24	36.21
18	Elite	Best	7.64	8.52	5.78
18	Elite	Fatigue	6.97457	3.33855	4.41176
18	Elite	RPE	10	8	9
19	Elite	Time	60.95	88.13	37.98
19	Elite	Best	8.24	9.45	5.98
19	Elite	Fatigue	5.66921	3.6214	5.85284
19	Elite	RPE	9	10	10
20	Elite	Time	58.19	80.61	37.48
20	Elite	Best	8.04	8.69	6
20	Elite	Fatigue	3.39375	3.06866	4.11111
20	Elite	RPE	8	10	8
21	Elite	Time	60.64	86.48	36.79
21	Elite	Best	8.18	9.14	6.02
21	Elite	Fatigue	5.9029	5.13008	1.85493
21	Elite	RPE	7	9	8
22	Elite	Time	62.43	90.78	40.48
22	Elite	Best	8.28	9.02	6.02
22	Elite	Fatigue	7.71222	11.8256	12.0709
22	Elite	RPE	8	9	8
23	High	Time	60.84	87.66	39.1
23	High	Best	7.82	9.19	5.9
23	High	Fatigue	11.1436	5.98477	10.452
23	High	RPE	7	8	8
24	High	Time	60.28	88.55	38.1
24	High	Best	7.9	9	5.8
24	High	Fatigue	9.00542	9.32099	9.48276
24	High	RPE	9	9	8
25	High	Time	62.9	90.3	37.49
25	High	Best	8.5	9.74	6.08
25	High	Fatigue	5.71429	3.01164	2.76864
25	High	RPE	10	7	7
26	High	Time	62.34	91.09	36.63
26	High	Best	8.48	9.71	5.97
26	High	Fatigue	5.02022	4.23389	2.26131
26	High	RPE	9	7	9
27	High	Time	66.21	97.83	39.34
27	High	Best	9.12	10.66	6.38
27	High	Fatigue	3.71241	1.96998	2.76907
27	High	RPE	10	8	9
28	High	Time	59.42	85.53	36.05
28	High	Best	8.01	9.08	5.84
28	High	Fatigue	5.97467	4.66226	2.88242
28	High	RPE	9	8	10
29	High	Time	62.6	90.16	38.57
29	High	Best	7.68	8.92	5.66
29	High	Fatigue	16.4435	12.3069	13.5748
29	High	RPE	8	8	9
30	High	Time	62.46	86.81	38.37
30	High	Best	8.16	8.96	5.9
30	High	Fatigue	9.34874	7.65129	8.38983
30	High	RPE	8	9	9
31	High	Time	61.83	88.17	38.1
31	High	Best	7.6	8.8	5.66
31	High	Fatigue	16.2218	11.3258	12.1908
31	High	RPE	7	7	8
32	High	Time	59.91	84.75	38.91
32	High	Best	7.91	8.88	5.98
32	High	Fatigue	8.19939	6.04354	8.44482
32	High	RPE	9	10	8
33	High	Time	58.55	83.67	37.4
33	High	Best	8.08	8.99	6.1
33	High	Fatigue	3.51839	3.4112	2.18579
33	High	RPE	8	10	7
34	High	Time	54.87	78.2	35.97
34	High	Best	7.54	8.27	5.58
34	High	Fatigue	3.95983	5.06516	7.43728
34	High	RPE	9	7	9
35	High	Time	60.59	90.73	35.25
35	High	Best	8.12	9.68	5.8
35	High	Fatigue	6.59747	4.14371	1.2931
35	High	RPE	8	8	8
